# Supplementary material for: Identification of Rare Causal Variants in Sequence-Based Studies: Methods and Applications to VPS13B, a Gene Involved in Cohen Syndrome and Autism
Source: PubMed Central journal article supplement (PMC4263785; doi:10.1371/journal.pgen.1004729), 2014-12-11
Supplement: pgen.1004729.s014.pdf [file pgen.1004729.s014.pdf]

| NS:S | $p_C$ | Model | NS vs. S |          | B <sub>1</sub> |          | B <sub>2</sub> |          | 2 B <sub>1</sub> and B <sub>2</sub> |          |
|------|-------|-------|----------|----------|----------------|----------|----------------|----------|-------------------------------------|----------|
|      |       |       | Bias     | Coverage | Bias           | Coverage | Bias           | Coverage | Bias                                | Coverage |
| 0.6  | 0.1   | M1    | 0.17     | 0.95     | 0.17           | 0.96     | 0.15           | 0.97     | 0.17                                | 0.97     |
|      |       | M2    | 0.28     | 0.90     | 0.26           | 0.91     | 0.22           | 0.93     | 0.23                                | 0.94     |
| 1.0  | 0.1   | M1    | 0.17     | 0.95     | 0.18           | 0.96     | 0.16           | 0.97     | 0.19                                | 0.97     |
|      |       | M2    | 0.29     | 0.90     | 0.27           | 0.90     | 0.24           | 0.92     | 0.25                                | 0.94     |
| 1.4  | 0.1   | M1    | 0.18     | 0.95     | 0.18           | 0.96     | 0.16           | 0.97     | 0.19                                | 0.97     |
|      |       | M2    | 0.29     | 0.90     | 0.28           | 0.90     | 0.24           | 0.92     | 0.26                                | 0.93     |
| 0.6  | 0.2   | M1    | 0.20     | 0.94     | 0.19           | 0.95     | 0.18           | 0.95     | 0.19                                | 0.96     |
|      |       | M2    | 0.37     | 0.87     | 0.33           | 0.88     | 0.29           | 0.90     | 0.29                                | 0.92     |
| 1.0  | 0.2   | M1    | 0.22     | 0.93     | 0.20           | 0.94     | 0.18           | 0.95     | 0.20                                | 0.96     |
|      |       | M2    | 0.40     | 0.87     | 0.36           | 0.87     | 0.31           | 0.90     | 0.31                                | 0.91     |
| 1.4  | 0.2   | M1    | 0.22     | 0.93     | 0.21           | 0.94     | 0.18           | 0.95     | 0.20                                | 0.96     |
|      |       | M2    | 0.41     | 0.87     | 0.37           | 0.87     | 0.32           | 0.89     | 0.32                                | 0.91     |
