# Supplementary material for: Identification of Rare Causal Variants in Sequence-Based Studies: Methods and Applications to VPS13B, a Gene Involved in Cohen Syndrome and Autism
Source: PubMed Central journal article supplement (PMC4263785; doi:10.1371/journal.pgen.1004729), 2014-12-11
Supplement: pgen.1004729.s015.pdf [file pgen.1004729.s015.pdf]

| chr | pos       | $n_A$ | $n_U$ | hom_A | hom_U | RC   | $\beta$ | stderr | PolyPhen-2 | GERP_RS | SnEff_effect      |
|-----|-----------|-------|-------|-------|-------|------|---------|--------|------------|---------|-------------------|
| 8   | 100133585 | 1     | 0     | 0     | 0     | 1    | 0.36    | 0.32   | 0.085      | 4.79    | non-synonymous    |
| 8   | 100155382 | 3     | 0     | 0     | 0     | 1    | 0.42    | 0.31   | 0.001      | 1.52    | non-synonymous    |
| 8   | 100520037 | 2     | 0     | 0     | 0     | 1    | 0.39    | 0.32   | 0.483      | 5.73    | non-synonymous    |
| 8   | 100205126 | 1     | 0     | 0     | 0     | 0.97 | 0.36    | 0.32   | 0.001      | -9.22   | non-synonymous    |
| 8   | 100844858 | 5     | 1     | 1     | 0     | 0.97 | 0.40    | 0.31   | 0.409      | 1.75    | non-synonymous    |
| 8   | 100493833 | 1     | 0     | 0     | 0     | 0.96 | 0.36    | 0.32   | 0.997      | 5.08    | non-synonymous    |
| 8   | 100874154 | 5     | 1     | 0     | 0     | 0.96 | 0.43    | 0.30   | 0.998      | 5.78    | non-synonymous    |
| 8   | 100523389 | 1     | 0     | 0     | 0     | 0.96 | 0.36    | 0.32   | 0.997      | 5.36    | non-synonymous    |
| 8   | 100654621 | 1     | 0     | 0     | 0     | 0.96 | 0.36    | 0.32   | 0.693      | 5.79    | non-synonymous    |
| 8   | 100861110 | 15    | 6     | 0     | 0     | 0.95 | 0.43    | 0.27   | 0.003      | 3.89    | non-synonymous    |
| 8   | 100654424 | 2     | 0     | 0     | 0     | 0.94 | 0.38    | 0.31   | 0.006      | -1.2    | non-synonymous    |
| 8   | 100874030 | 10    | 2     | 0     | 0     | 0.94 | 0.50    | 0.29   | 0.999      | 5.66    | non-synonymous    |
| 8   | 100155285 | 1     | 0     | 0     | 0     | 0.94 | 0.36    | 0.32   | 0.003      | 1.37    | non-synonymous    |
| 8   | 100796685 | 1     | 0     | 0     | 0     | 0.94 | 0.36    | 0.32   | 0.999      | 5.47    | non-synonymous    |
| 8   | 100844849 | 1     | 0     | 0     | 0     | 0.94 | 0.36    | 0.32   | 0.003      | 1.75    | non-synonymous    |
| 8   | 100287477 | 1     | 0     | 0     | 0     | 0.94 | 0.36    | 0.32   | 0.003      | -4.76   | non-synonymous    |
| 8   | 100866155 | 1     | 0     | 0     | 0     | 0.93 | 0.37    | 0.32   | 0.918      | 5.54    | non-synonymous    |
| 8   | 100128062 | 1     | 0     | 0     | 0     | 0.93 | 0.37    | 0.32   | 0.005      | -6.46   | non-synonymous    |
| 8   | 100286562 | 1     | 0     | 0     | 0     | 0.92 | 0.36    | 0.32   | 0.99       | 5.65    | splice site donor |
| 8   | 100865765 | 1     | 0     | 0     | 0     | 0.92 | 0.36    | 0.32   | 0.99       | 5.43    | stop gained       |
