# Supplementary material for: Identification of Rare Causal Variants in Sequence-Based Studies: Methods and Applications to VPS13B, a Gene Involved in Cohen Syndrome and Autism
Source: PubMed Central journal article supplement (PMC4263785; doi:10.1371/journal.pgen.1004729), 2014-12-11
Supplement: pgen.1004729.s016.pdf [file pgen.1004729.s016.pdf]

## Autism Spectrum Disorder Sequencing data

The ASD case-control dataset has been sequenced as part of the ARRA Autism Sequencing Collaboration (AASC), and is publicly available through dbGaP (dbGaP Study Accession: phs000298.v1.p1). The dataset consists of 488 ASD cases and 372 controls of European ancestry, and whole-exome sequencing was performed at the Broad Institute using an Illumina HiSeq2000 platform. Data was processed with Picard[1] and BWA[2] to map reads to hg19. Variants were called using the Genome Analysis Toolkit[3] and only those variants that passed standard quality control filters were analyzed.

## References

1. DePristo MA, Banks E, Poplin R, Garimella KV, Maguire JR, Hartl C, Philippakis AA, del Angel G, Rivas MA, Hanna M et al. (2011) A framework for variation discovery and genotyping using next-generation DNA sequencing data. *Nat Genet* 43: 491–498.
2. Li H, Durbin R (2010) Fast and accurate long-read alignment with Burrows-Wheeler transform. *Bioinformatics* 26: 589–595.
3. McKenna A, Hanna M, Banks E, Sivachenko A, Cibulskis K, Kernytzky A, Garimella K, Altshuler D, Gabriel S, Daly M et al. (2010) The Genome Analysis Toolkit: A MapReduce framework for analyzing next-generation DNA sequencing data. *Genome Res* 20: 1297–1303.
